# Supplementary material for: Carbazole-based compounds containing aldehyde and cyanoacetic acid: optical properties and applications in photopolymerization
Source: Royal Society of Chemistry journal article supplement (doi:10.1039/c7ra11887b), 2017-01-01
Supplement: c7ra11887b1.pdf [file c7ra11887b1.pdf]

*Electronic Supplementary Information (ESI) for*

**Carbazole based compounds containing aldehyde and cyanoacetic acid:  
optical properties and application in photopolymerization**

Hussain Ahmed Abro<sup>a,b</sup>, Tengfei Zhou<sup>b</sup>, Weixiang Han<sup>b</sup>, Tanlong Xue<sup>b</sup>, Tao Wang<sup>a,b\*</sup>

<sup>a</sup>State Key Laboratory of Chemical Resource Engineering, College of Science, Beijing University of Chemical Technology, Beijing 100029, China

<sup>b</sup>Department of Organic Chemistry, College of Science, Beijing University of Chemical Technology, Beijing 100029, PR China

Correspondence to: Prof: Tao Wang (E-mail: [wangtwj2000@163.com](mailto:wangtwj2000@163.com))

Contact # +86 64445350

**Contents**

|                                                                                                    |    |
|----------------------------------------------------------------------------------------------------|----|
| <b>Fig. S1</b> Abbreviations and composites involved in this work .....                            | 2  |
| <b>Fig. S2</b> <sup>1</sup> H NMR Spectrum of CCC in Chloroform-d.....                             | 3  |
| <b>Fig. S3</b> <sup>13</sup> C NMR Spectrum of CCC in Chloroform-d .....                           | 4  |
| <b>Fig. S4</b> <sup>1</sup> H NMR Spectrum of TCC in in Chloroform-d.....                          | 5  |
| <b>Fig. S5</b> <sup>13</sup> C NMR Spectrum of TCC in in Chloroform-d.....                         | 6  |
| <b>Fig. S6</b> <sup>1</sup> H NMR Spectrum of CCN in DMSO-d <sub>6</sub> .....                     | 7  |
| <b>Fig. S7</b> <sup>13</sup> C NMR Spectrum of CCN in DMSO-d <sub>6</sub> .....                    | 8  |
| <b>Fig. S8</b> <sup>1</sup> H NMR Spectrum of TCN in DMSO-d <sub>6</sub> .....                     | 9  |
| <b>Fig. S9</b> <sup>13</sup> C NMR Spectrum of TCN in DMSO-d <sub>6</sub> .....                    | 10 |
| <b>Fig. S10</b> IR Spectrum of CCC .....                                                           | 10 |
| <b>Fig. S11</b> IR Spectrum of TCC .....                                                           | 11 |
| <b>Fig. S12</b> IR Spectrum of CCN .....                                                           | 11 |
| <b>Fig. S13</b> IR Spectrum of TCN .....                                                           | 11 |
| <b>Table S1</b> The Optimized conditions for synthesis four kinds of dye containing aldehyde ..... | 12 |

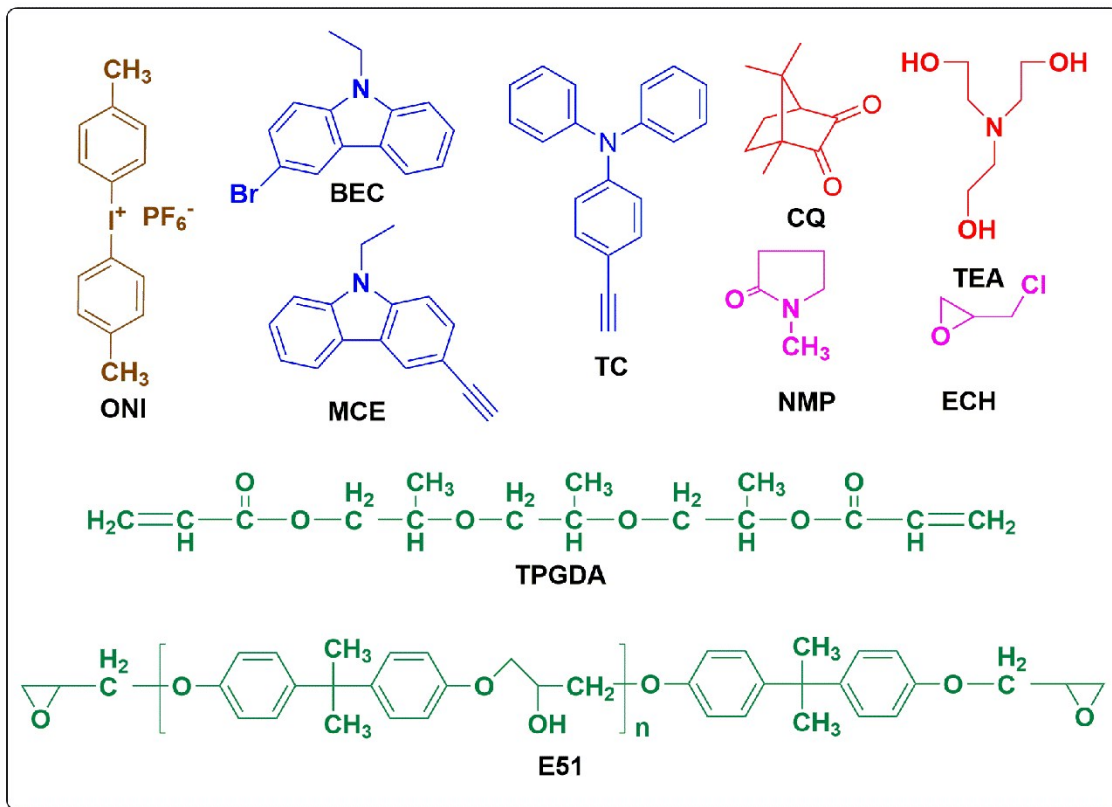

Fig. S1 Abbreviations and composites involved in this work

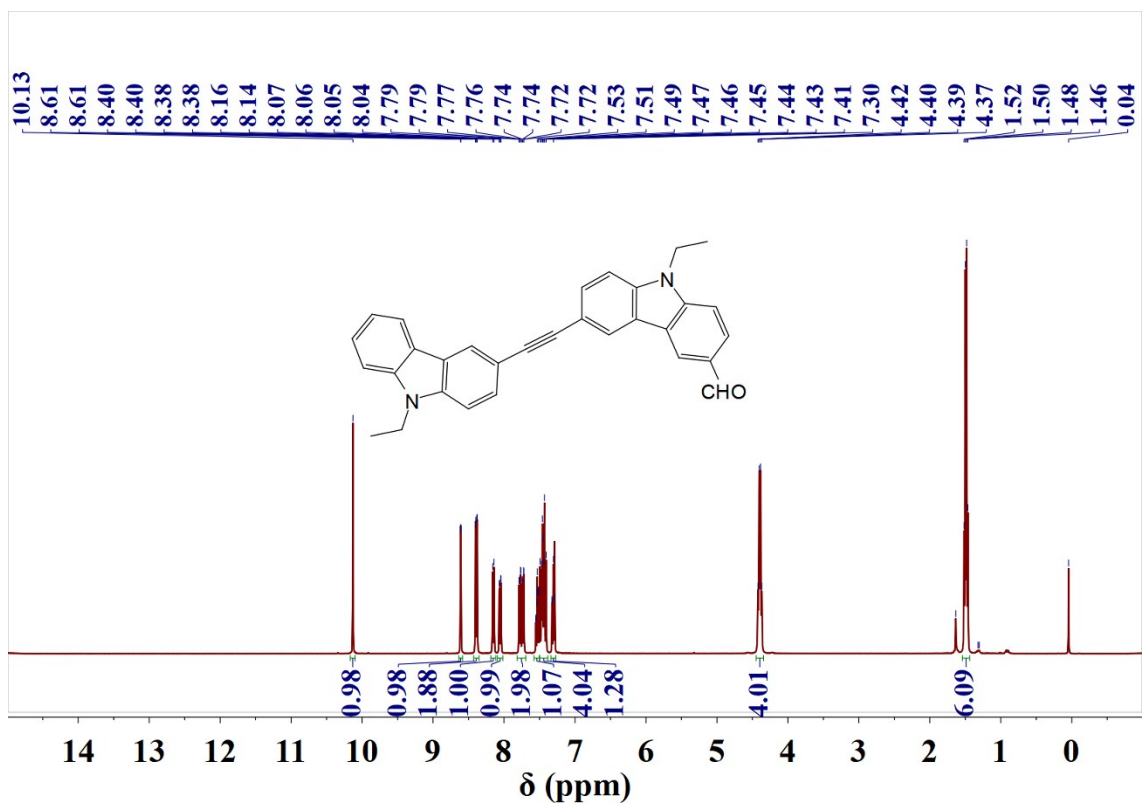

Fig. S2  $^1\text{H}$  NMR Spectrum of CCC in Chloroform-*d*

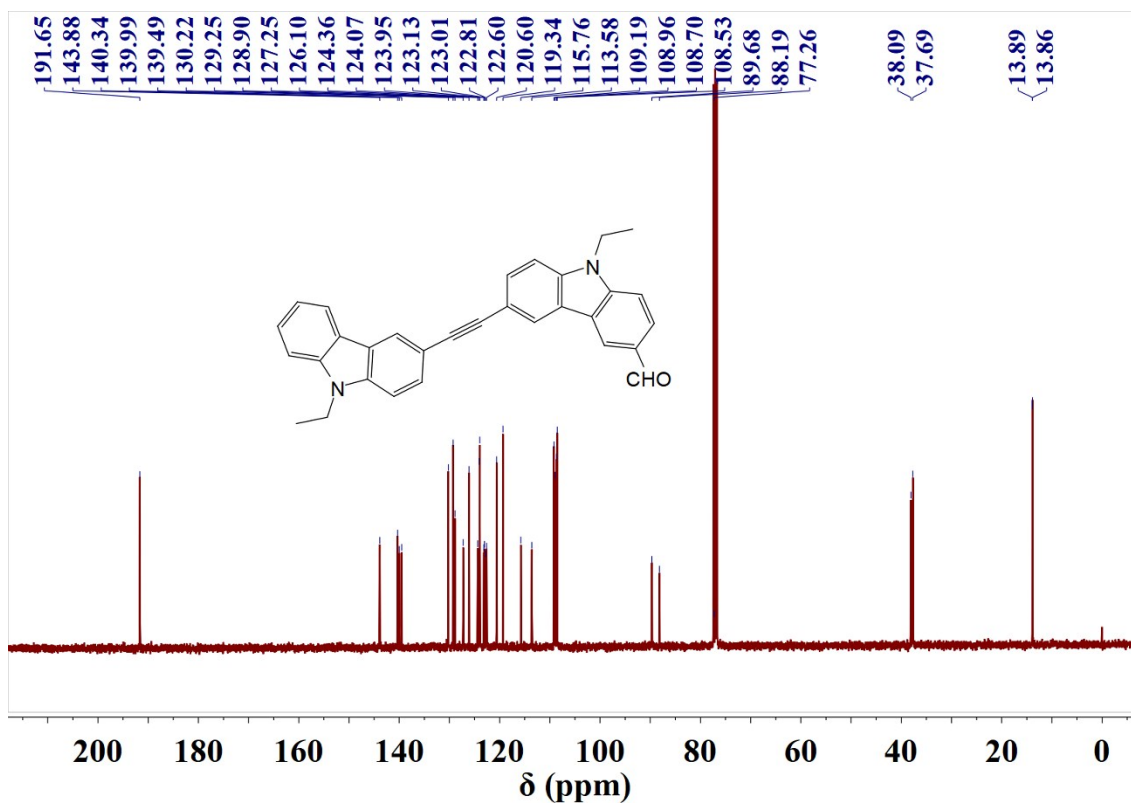

Fig. S3  $^{13}\text{C}$  NMR Spectrum of CCC in Chloroform-*d*

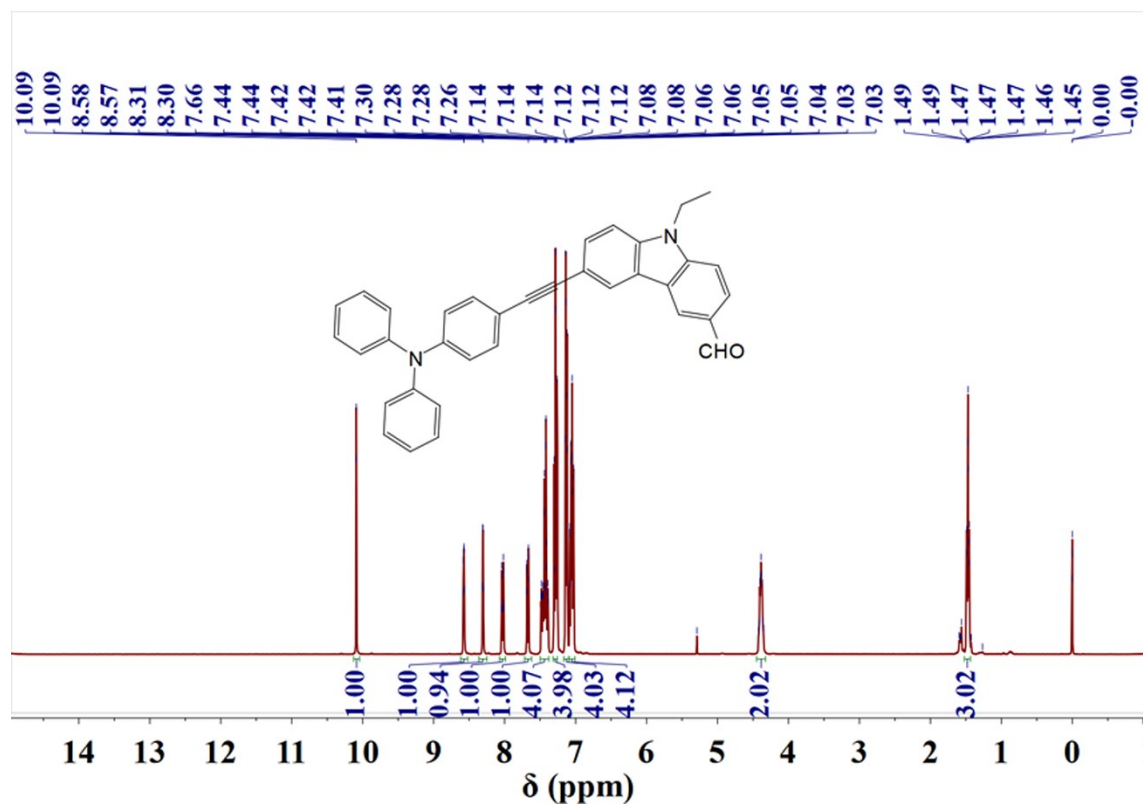

Fig. S4  $^1\text{H}$  NMR Spectrum of TCC in in Chloroform-*d*

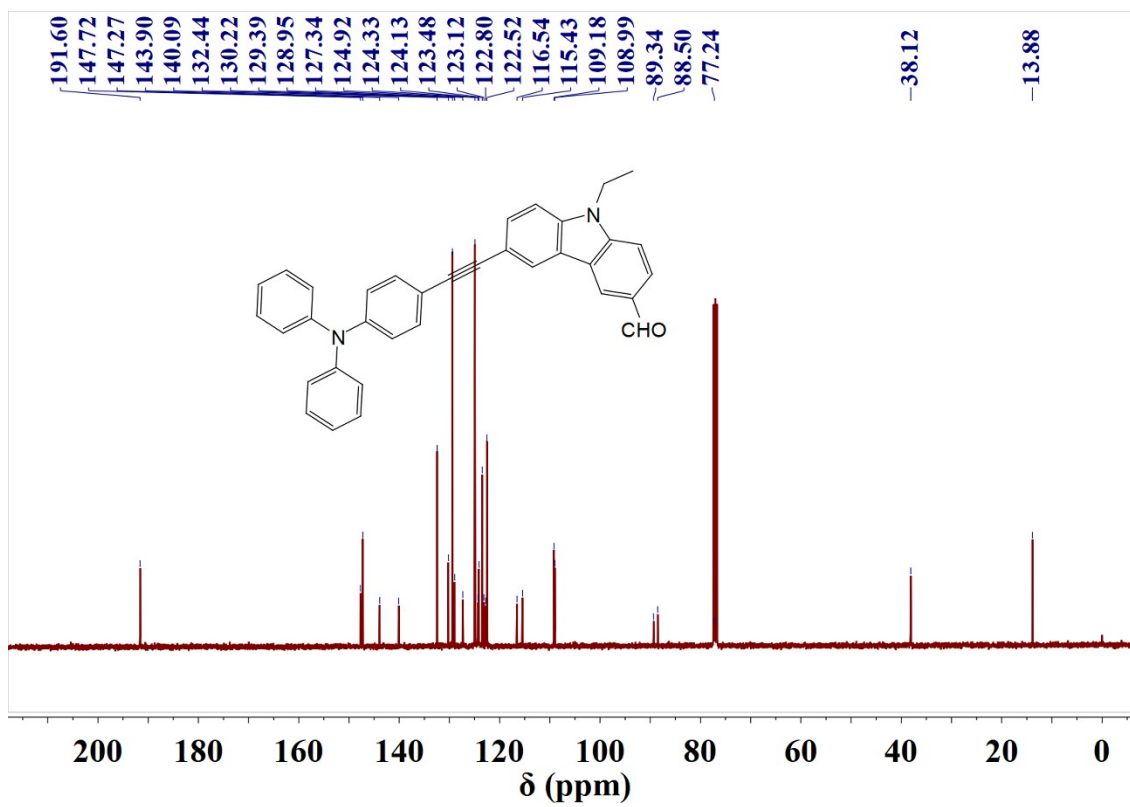

Fig. S5  $^{13}\text{C}$  NMR Spectrum of TCC in in Chloroform-*d*

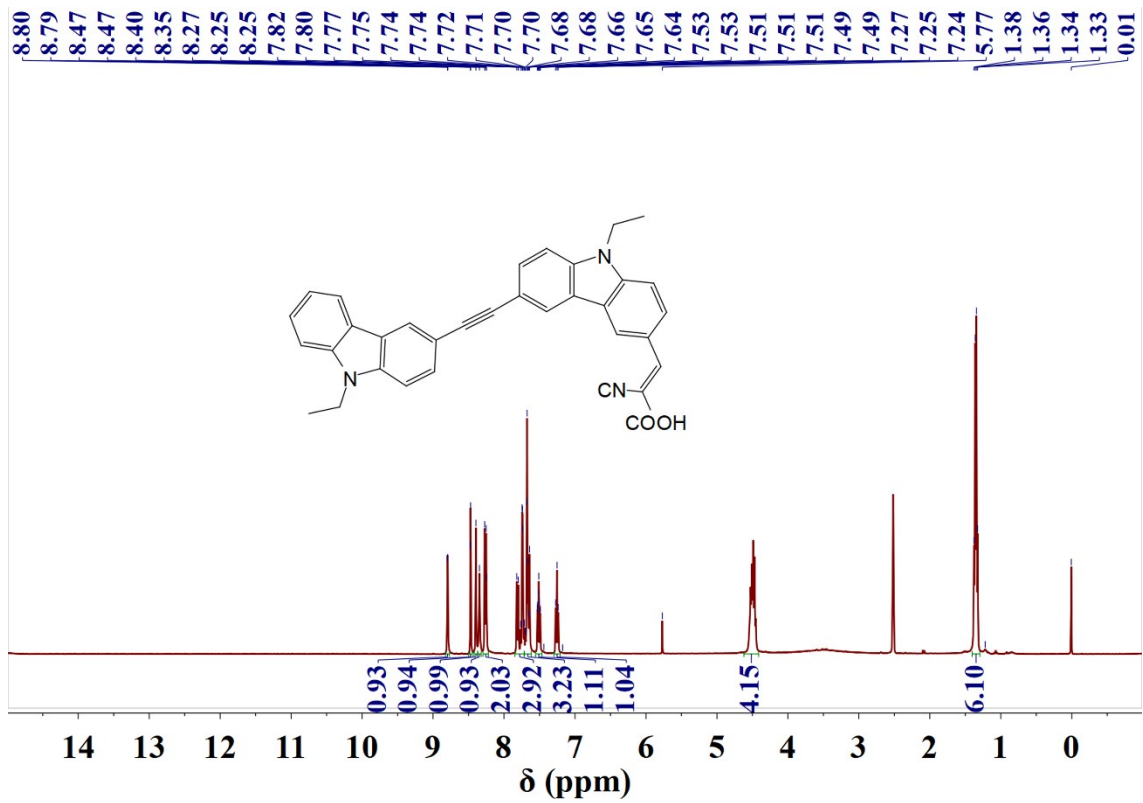

Fig. S6  $^1\text{H}$  NMR Spectrum of CCN in  $\text{DMSO-}d_6$

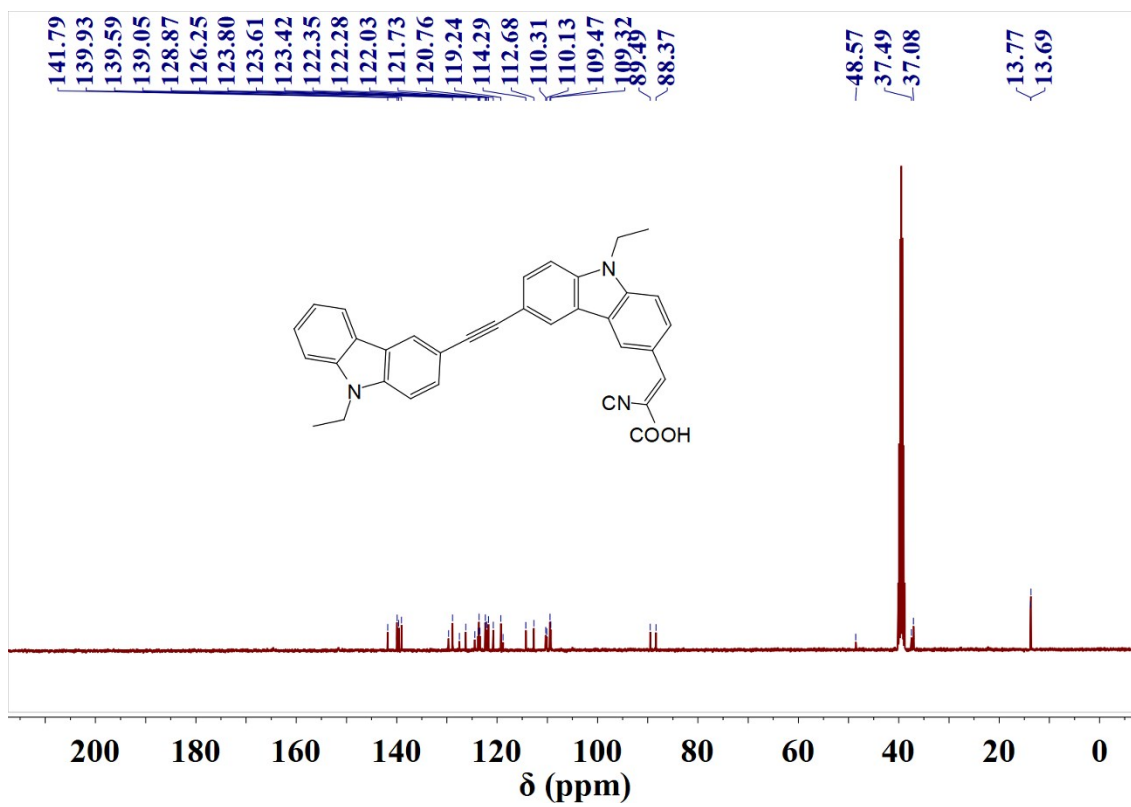

Fig. S7  $^{13}\text{C}$  NMR Spectrum of CCN in  $\text{DMSO-}d_6$



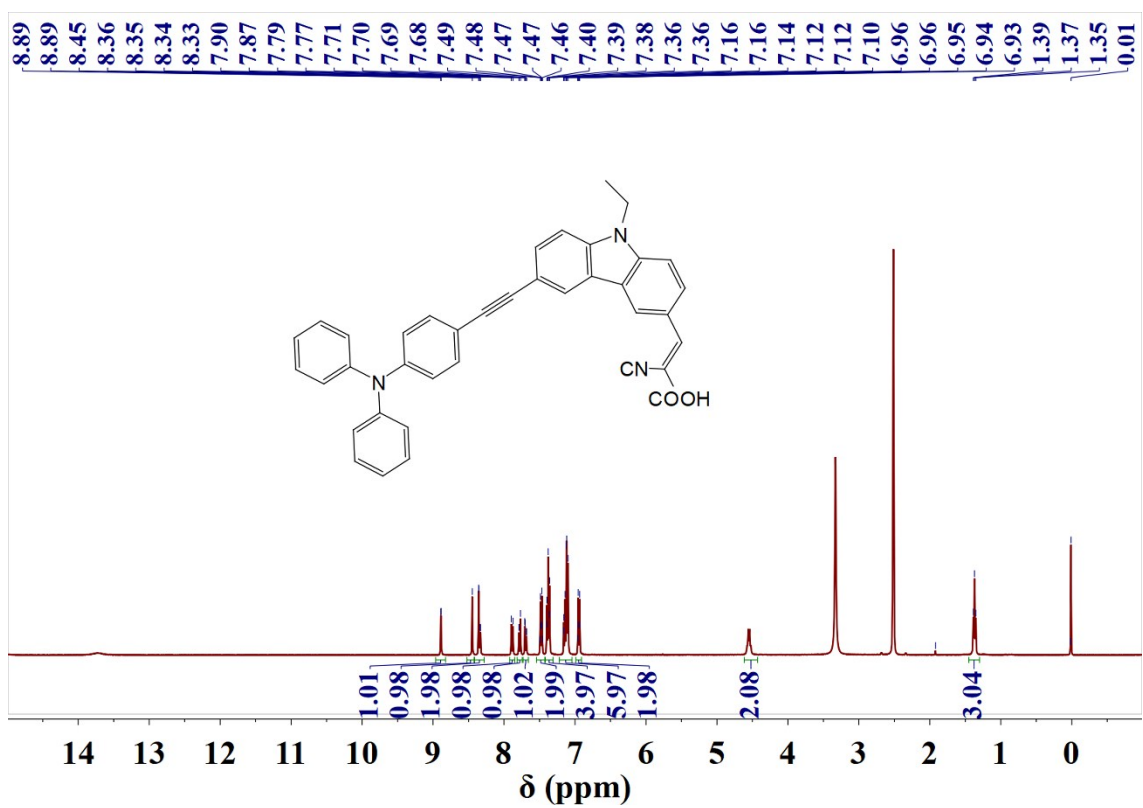

Fig. S8  $^1\text{H}$  NMR Spectrum of TCN in  $\text{DMSO-}d_6$

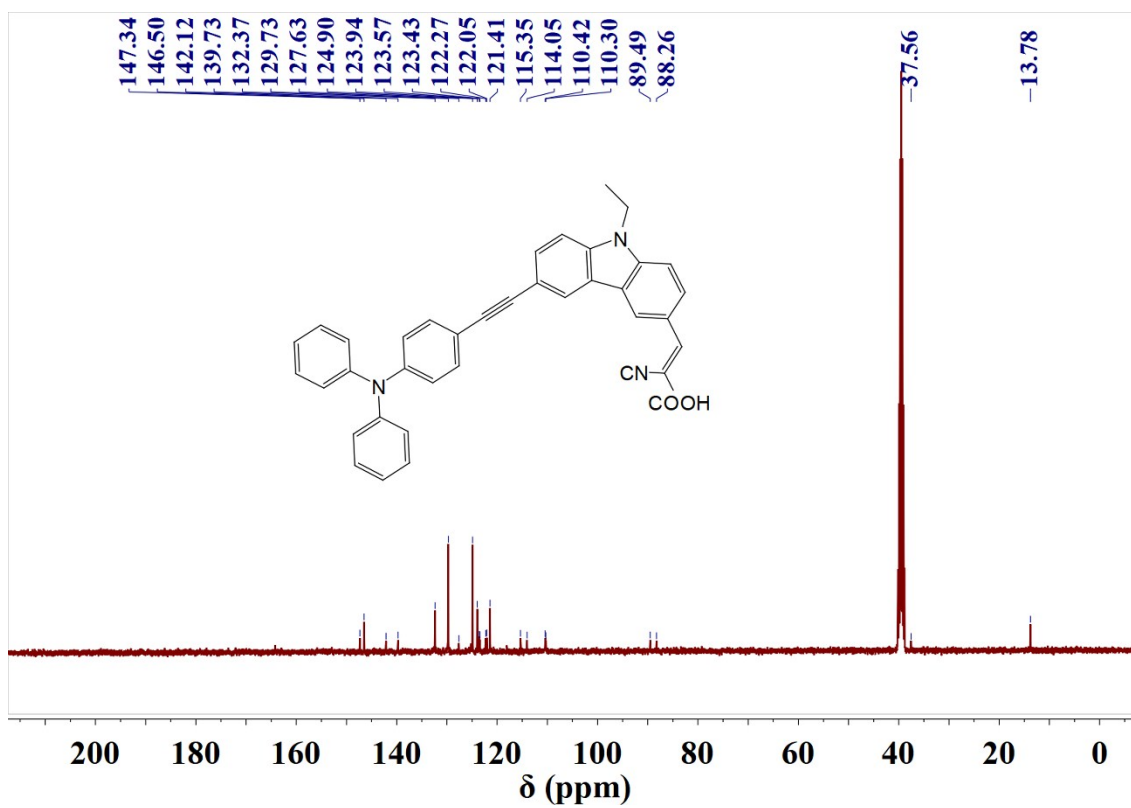

Fig. S9  $^{13}\text{C}$  NMR Spectrum of TCN in  $\text{DMSO-}d_6$

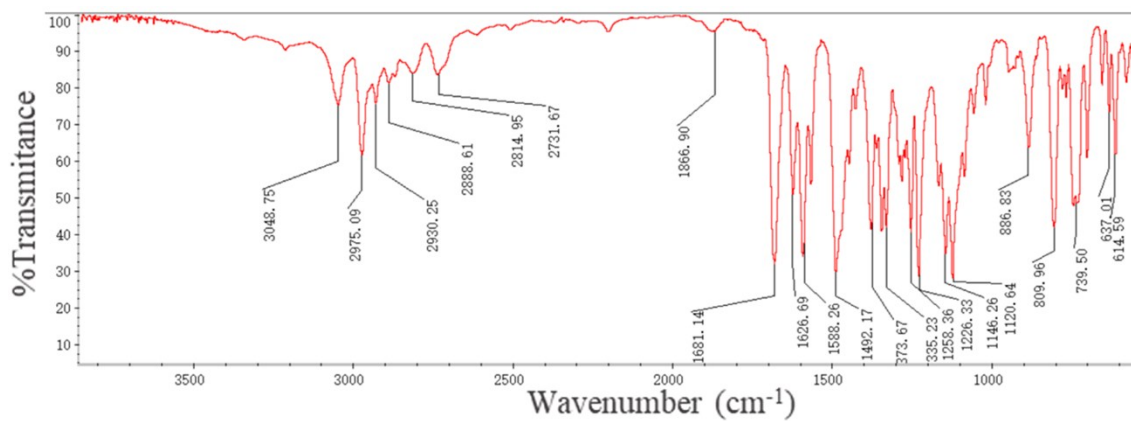

Fig. S10 IR Spectrum of CCC

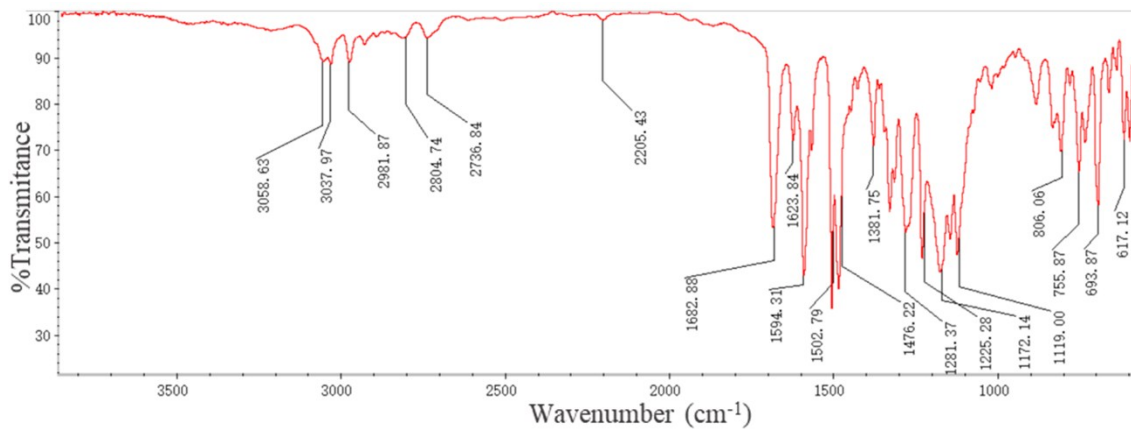

**Fig. S11** IR Spectrum of TCC

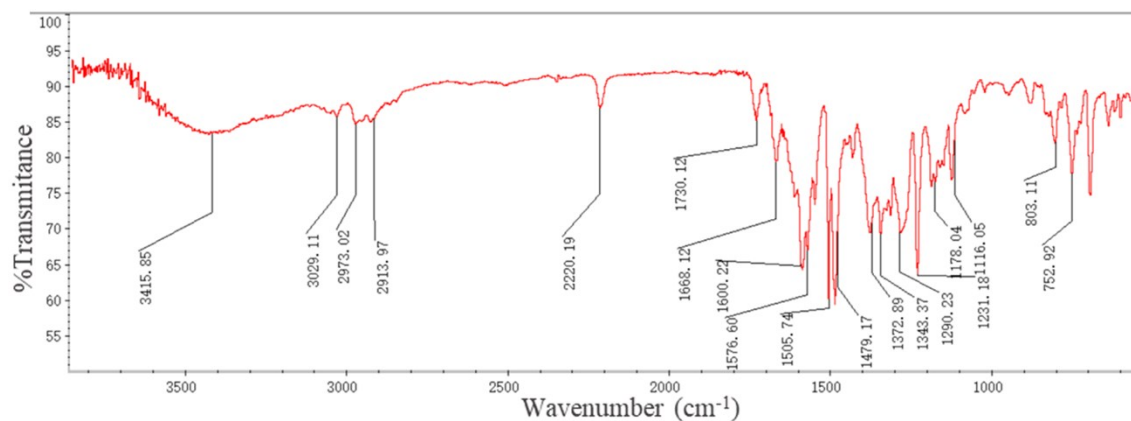

**Fig. S12** IR Spectrum of CCN

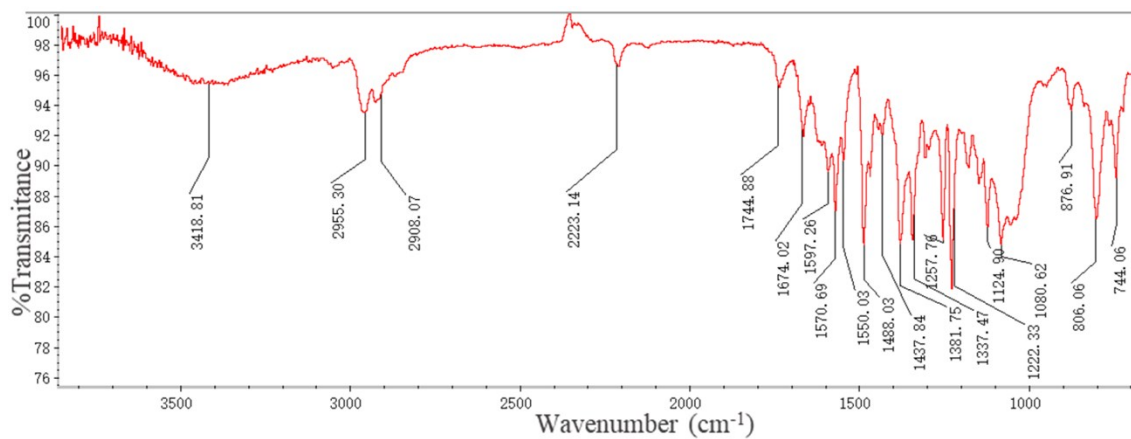

**Fig. S13** IR Spectrum of TCN

**Table S1** The Optimized conditions for synthesis four kinds of dye containing aldehyde

| Test | Material | Pd(PPh <sub>3</sub> ) <sub>2</sub> Cl <sub>2</sub> | Temperat | Status of | Finishing | Yield |
|------|----------|----------------------------------------------------|----------|-----------|-----------|-------|
|------|----------|----------------------------------------------------|----------|-----------|-----------|-------|

|   | Ratio |       | ure /°C | Reaction | time | %  |
|---|-------|-------|---------|----------|------|----|
| 1 | 1.00  | 0.03  | 85      | No       | --   | -- |
| 2 | 1.05  | 0.03  | 85      | No       | --   | -- |
| 3 | 1.1   | 0.03  | 85      | Yes      | 4    | 43 |
| 4 | 1.1   | 0.02  | 85      | Yes      | 4    | 59 |
| 5 | 1.1   | 0.015 | 85      | Yes      | 6    | 71 |
| 6 | 1.1   | 0.015 | 55      | Yes      | 10   | 88 |
| 7 | 1.1   | 0.015 | r.t     | No       | --   | -- |
